# Supplementary material
Source: PubMed Central journal article supplement (PMC6374086)
Supplement: jcsm.15.2.183s1.pdf [file jcsm.15.2.183s1.pdf]

**Figure S1 - Lack of association between AHIs and subjective sleepiness.**

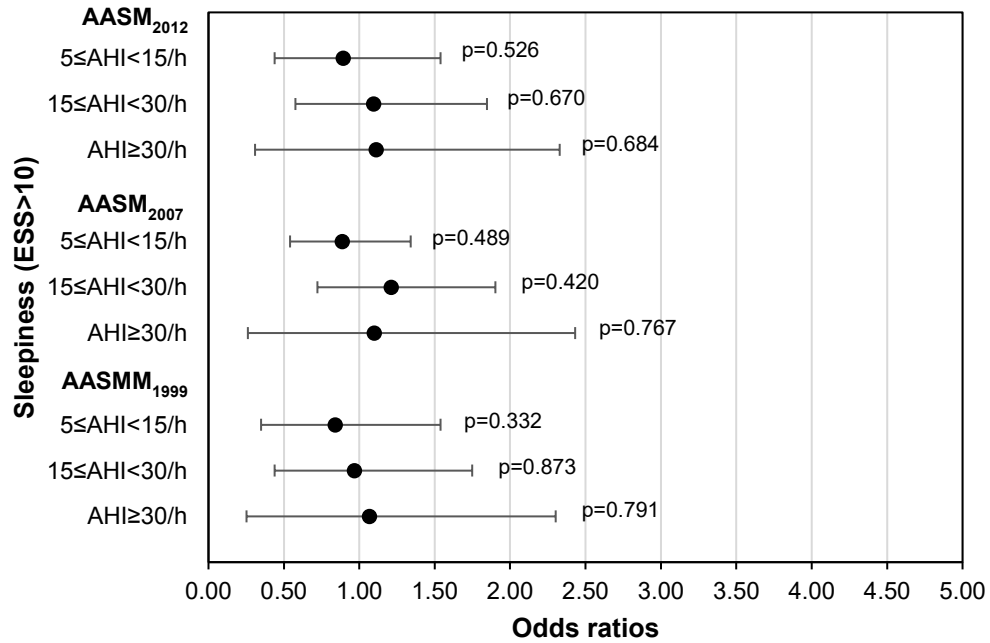

Odds ratio and 95% confidence intervals of the association between apnea-hypopnea index (AHI) categories (15 < AHI ≤ 5/h, 30 < AHI ≤ 15/h and AHI ≥ 30/h compared to AHI < 5/h) derived from three different recommended AASM criteria (1999, 2007 and 2012) and the presence of sleepiness assessed by Epworth Sleepiness Score (ESS) (n=1,982) in the HypnoLaus cohort. Data analyzed with multivariable logistic regression adjusted for age, body mass index and sex.

**Table S1 - Summary of the hypopnea scoring criteria considered in the study.**

|                      | <b>Airflow changes</b>             | <b>EEG arousal</b> | <b>Oxygen desaturation</b> |
|----------------------|------------------------------------|--------------------|----------------------------|
| AASM <sub>1999</sub> | ≥50% reduction without consequence | -                  | -                          |
|                      | <50% reduction with 1 consequence  | +                  | ≥3%                        |
| AASM <sub>2007</sub> | ≥30% reduction with 1 consequence  | -                  | ≥4%                        |
| AASM <sub>2012</sub> | ≥30% reduction with 1 consequence  | +                  | ≥3%                        |

AASM: American Academy of Sleep Medicine, EEG: electroencephalogram.

**Table S2 - Lack of association between subjective sleepiness (ESS>10) and different polysomnographic parameters in the HypnoLaus cohort.**

| Variable             | p-value              | AUC   | 95% CI |       |       |
|----------------------|----------------------|-------|--------|-------|-------|
|                      |                      |       | Lower  | Upper |       |
| <b>AHI</b>           | AASM <sub>2012</sub> | 0.433 | 0.485  | 0.447 | 0.523 |
|                      | AASM <sub>2007</sub> | 0.262 | 0.478  | 0.440 | 0.517 |
|                      | AASM <sub>1999</sub> | 0.412 | 0.484  | 0.446 | 0.522 |
| <b>3% ODI</b>        |                      | 0.412 | 0.484  | 0.446 | 0.523 |
| <b>4% ODI</b>        |                      | 0.372 | 0.483  | 0.444 | 0.521 |
| <b>Arousal index</b> |                      | 0.826 | 0.496  | 0.458 | 0.534 |

AASM: American Academy of Sleep Medicine, AASM<sub>1999</sub>: "Chicago criteria" hypopnea definition, AASM<sub>2007</sub>: 2007 AASM recommended hypopnea definitions, AASM<sub>2012</sub>: 2012 AASM recommended hypopnea definitions, AHI: apnea-hypopnea index, AUC: area under the curve, CI: confidence interval, ODI: oxygen desaturation index. Data expressed as AUC, 95% CI, and analyzed using receiver operating characteristic (ROC) operating curve.
